# Supplementary material
Source: publisher figshare collection journal article supplement (https://karger.figshare.com/ndownloader/files/25009826)
Supplement: Supplementary file 1 [file 25009826]

Supportive information Table 2:Descriptive statistic of the study cohort. Shown is the intra- and post-operative data (abbreviation: pRBCs = packed red blood cells).

| **Variables** | | | **n (%) for binary variables, otherwise mean (median, range)** | **Missing**  **values** |
| --- | --- | --- | --- | --- |
| *Intra- and postoperative details* | | |  |  |
| Left atypical liver resection | | 1 point | 24 (7.43%) | 0 (0.0%) |
| Right atypical liver resection | | 80 (24.77%) |
| Left segmental liver resection | | 2 points | 12 (3.72%) |
| Right segmental liver resection | | 18 (5.57%) |
| Bilateral atypical | | 47 (14.55%) |
| Left hemihepatectomy | | 3 points | 20 (6.19%) |
| Right hemihepatectomy | | 4 points | 55 (17.03%) |
| Extended left hepatectomy | | 5 points | 28 (8.67%) |
| Extended right hepatectomy | | 6 points | 13 (4.02%) |
| Left hepatectomy and right atypical liver resection | | 8 (2.48%) |
| Right hepatectomy and left atypical liver resection | | 7 points | 18 (5.57%) |
| Duration of surgery in min | | | 163.58 (150.00; 40.00-606.00) |
| Duration of Pringle’s maneuver in min | | | 16.90 (17.00; 0.00-72.00) |
| Intra-operative transfusion of pRBCs | | | 102 (31.58%) |
| Units of intra-operatively transfused pRBCs | | | 1.26 (0.00; 0.00-40.00) |
| Grading | G1 | | 1 (0.32%) | 7 (2.2%) |
| metastases | G2 | | 305 (96.52%) |
|  | G3 | | 10 (3.16%) |
| R status | R0 | | 305 (94.72%) | 1 (0.3%) |
| R1 | | 15 (4.66%) |
| R2 | | 2 (0.62%) |
| Distance to resection margin in mm | | | 6.37 (2.00; 0.00-70.00) | 5 (1.6%) |
| Size of largest metastases in mm | | | 49.49 (40.00; 5.00-200.00) | 22 (6.8%) |
| Hepatic macrovesicular steatosis in % | | | 10.86 (5.00; 0.00-70.00) | 0 (0.0%) |
| Hepatic macrovesicular steatosis >20% | | | 46 (14.24%) | 0 (0.0%) |
| Hepatic macrovesicular steatosis ≤20% | | | 277 (85.76%) | 0 (0.0%) |
| Clavien Dindo | 0 | | 261 (81.06%) | 1 (0.3%) |
| stages | I | | 12 (3.73%) |
|  | II | | 12 (3.76%) |
|  | III | | 29 (9.01%) |
|  | IV | | 3 (0.93%) |
|  | V | | 5 (1.55%) |
